# Supplementary material for: Amorphous Poly (Aryl Ether Ketones) Containing Methylene Groups with Excellent Thermal Resistance, Dielectric Properties and Mechanical Performance
Source: MDPI journal article supplement (doi:10.3390/polym15214330), 2023-11-06
Supplement: s1 [file s1]

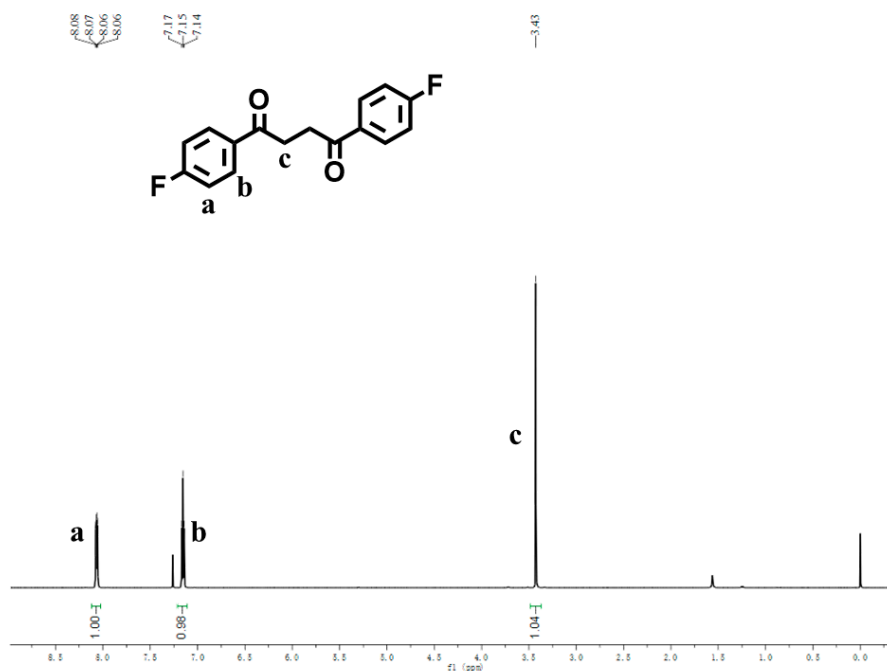

**Figure S1.**  $^1\text{H}$  NMR spectrum of BFB.

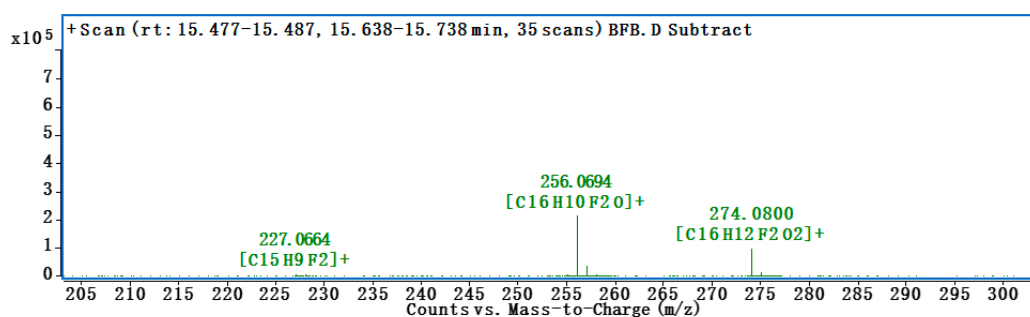

**Figure S2.** High-resolution gas chromatography-mass spectroscopy of BFB.

**Figure. S3.**  $^1\text{H}$  NMR spectrum of DPFP.

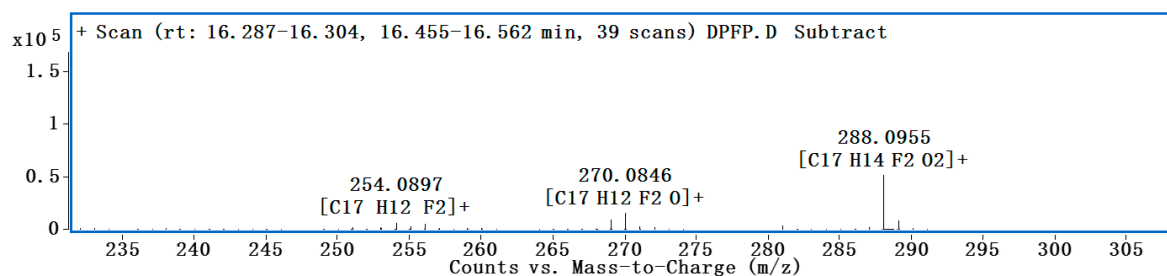

**Figure S4.** High-resolution gas chromatography-mass spectroscopy of DPFP.

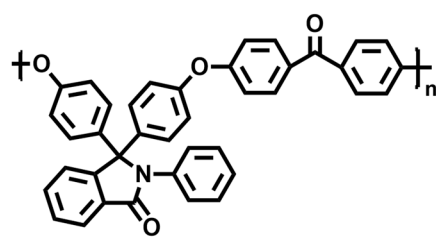

**PEK-In**

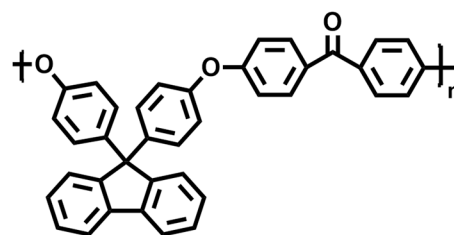

**PEK-BPF**

**Figure S5.** Structural formulas for PEK-In and PEK-BPF.
